# Supplementary material for: Discovery of New Glucose Uptake Inhibitors as Potential Anticancer Agents by Non-Radioactive Cell-Based Assays
Source: MDPI journal article supplement (doi:10.3390/molecules27228106), 2022-11-21
Supplement: s1 [file s1]

Phloretin

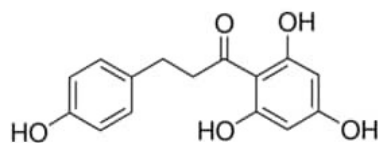

Resveratrol

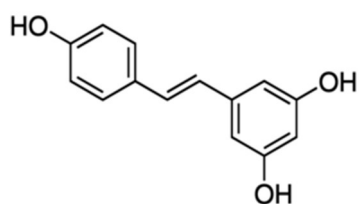

cytochalasin B

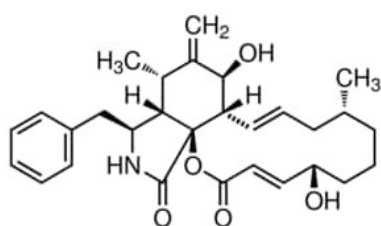

WZB117

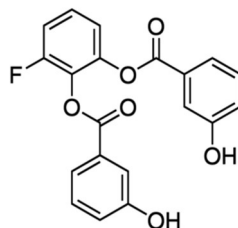

BAY-876

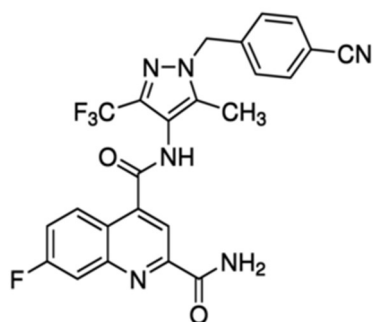

**Figure S1.** Chemical structure of known GLUT1 inhibitors phloretin, resveratrol, cytochalasin B, WZB117 and BAY-876.

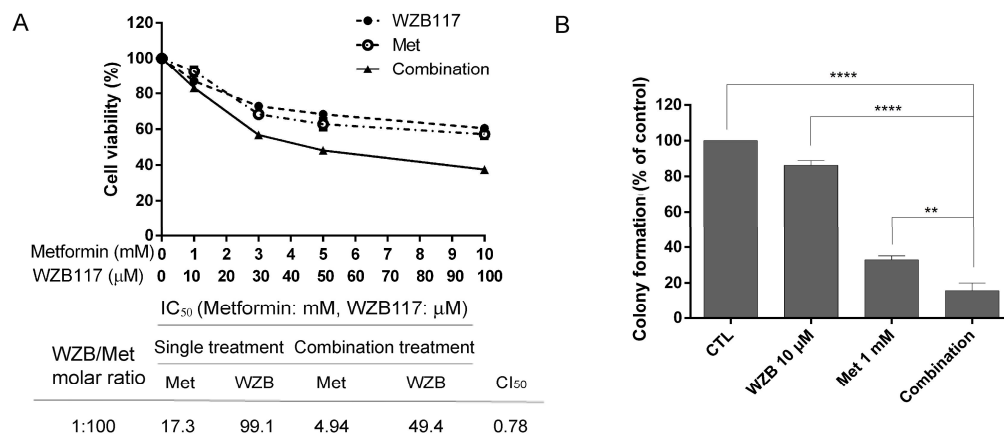

**Figure S2.** WZB117 and metformin exhibit a synergistic anticancer effect in SKOV3 cells. **(A)** WZB117 synergized with metformin. Cells were seeded in 96-well plates and cell viability was measured by the MTT assay after 72 h of drug treatment. **(B)** Colony formation assay of the combination of WZB117 and metformin. Cells were seeded in 6-well plates and treated with indicated drugs for 10 days. CTL: vehicle control; Met: metformin; WZB: WZB117. Data are presented as mean  $\pm$  SEM of at least three independent experiments. Statistical significance was assessed by one-way ANOVA. \*\*,  $P < 0.01$ ; \*\*\*\*,  $P < 0.0001$ .

**A**

#12

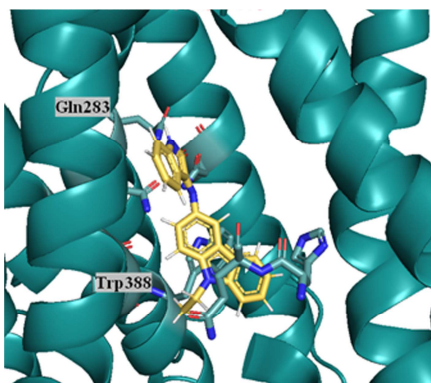

#16

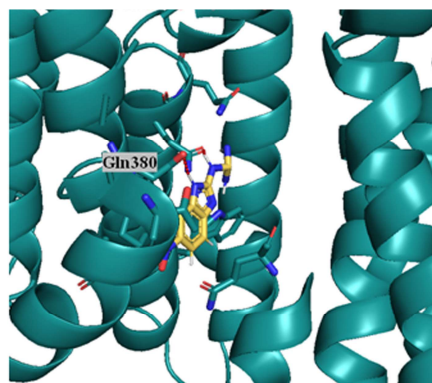

#43

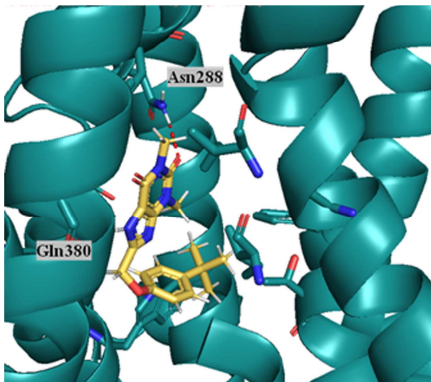

#69

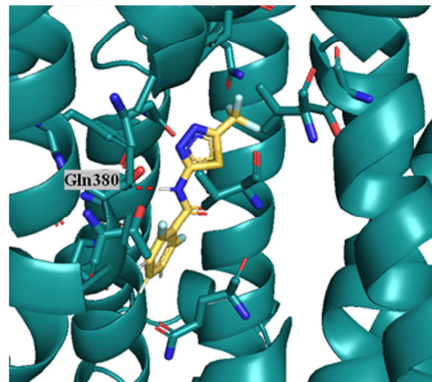

WZB117

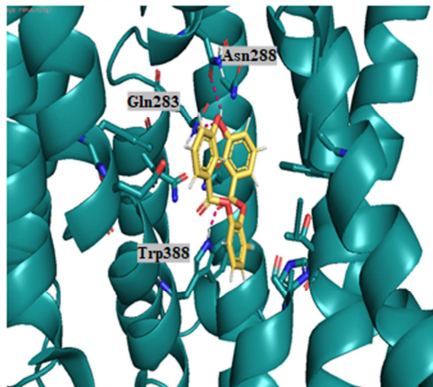

**B**

#12

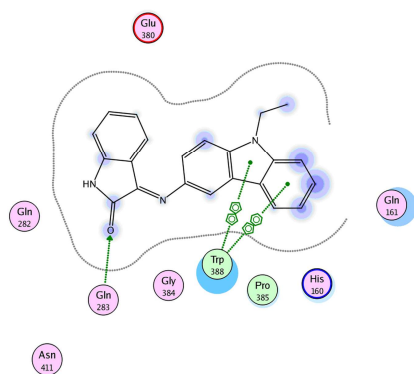

WZB117

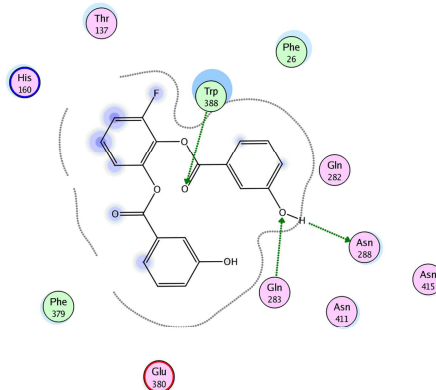

**Figure S3.** Molecular docking of GLUT1 inhibitors #12, #16, #43, #69 and WZB117. (A) Molecular docking analysis of new GLUT1 inhibitors #12, #16, #43 and #69, and WZB117 with hGLUT1. Hydrogen bonds are denoted with broken red lines. (B) Both #12 and WZB117 interacted with Gln283 and Trp388 of hGLUT1 via hydrogen bonds. X-ray structure of the hGLUT1 co-crystallized with a ligand n-nonyl- $\beta$ -D-glucopyranoside ( $\beta$ -NG) in the IOP conformation (PDB ID: 4PYP) was retrieved from the RCSB Protein Data Bank. MOE software was used for the molecular docking analysis. PyMOL was then used to prepare the figures.

**Table S1.** The GLUT1 inhibitory activity of NCI compounds #1-#75 determined by high-throughput 2-NBDG uptake assay in COS-7 cells.

| Compound <sup>a</sup> | Uptake (%)          | Compound <sup>a</sup> | Uptake (%)          |
|-----------------------|---------------------|-----------------------|---------------------|
| CTL                   | 100                 | 37                    | 106.8 ± 6.97        |
| Phloretin (50 µM)     | 56.38 ± 3.63        | 38                    | 115.1 ± 9.91        |
| Phloretin (100 µM)    | 53.83 ± 0.87        | 39                    | 95.10 ± 4.30        |
| 1                     | 89.58 ± 3.52        | <b>40</b>             | <b>79.49 ± 4.92</b> |
| 2                     | 91.11 ± 8.61        | 41                    | 90.39 ± 4.57        |
| 3                     | *59.36 ± 5.38       | 42                    | 91.75 ± 1.66        |
| 4                     | 89.10 ± 3.18        | <b>43</b>             | <b>59.68 ± 2.28</b> |
| 5                     | 97.44 ± 4.43        | 44                    | 108.5 ± 10.50       |
| 6                     | 112.5 ± 6.30        | 45                    | 107.3 ± 10.68       |
| 7                     | 90.79 ± 3.91        | <b>46</b>             | <b>84.7 ± 5.81</b>  |
| 8                     | *22.37 ± 6.07       | 47                    | 97.92 ± 5.41        |
| 9                     | 87.38 ± 9.87        | <b>48</b>             | <b>82.52 ± 3.00</b> |
| 10                    | 93.33 ± 8.93        | 49                    | 106.4 ± 7.37        |
| <b>11</b>             | <b>82.23 ± 5.51</b> | 50                    | 100.6 ± 6.48        |
| <b>12</b>             | <b>77.46 ± 3.82</b> | 51                    | 101.2 ± 6.51        |
| 13                    | 93.93 ± 8.50        | 52                    | 126.7 ± 5.50        |
| <b>14</b>             | <b>75.10 ± 8.84</b> | 53                    | 94.81 ± 5.88        |
| 15                    | 87.44 ± 2.04        | 54                    | 88.48 ± 4.07        |
| <b>16</b>             | <b>74.36 ± 2.99</b> | 55                    | 89.09 ± 5.51        |
| 17                    | 115.4 ± 9.17        | 56                    | 132.0 ± 15.97       |
| 18                    | 97.22 ± 4.65        | 57                    | 97.97 ± 1.39        |
| 19                    | 302.4 ± 11.46       | 58                    | 86.81 ± 8.14        |
| 20                    | 99.59 ± 3.06        | 59                    | 106.2 ± 8.21        |
| 21                    | 87.54 ± 6.06        | 60                    | 101.6 ± 3.94        |
| 22                    | 102.2 ± 7.53        | 61                    | 104.5 ± 5.09        |
| 23                    | 93.37 ± 4.09        | 62                    | 102.1 ± 7.48        |
| 24                    | 96.93 ± 3.59        | 63                    | 105.7 ± 9.6         |
| 25                    | *54.23 ± 3.54       | 64                    | 103.4 ± 2.79        |
| 26                    | 92.34 ± 4.81        | 65                    | 88.40 ± 8.60        |
| 27                    | 146.5 ± 13.9        | 66                    | 111.1 ± 5.6         |
| 28                    | 109.0 ± 9.81        | 67                    | 98.4 ± 4.88         |
| 29                    | 107.7 ± 6.58        | 68                    | 91.43 ± 3.65        |
| 30                    | 88.73 ± 8.64        | <b>69</b>             | <b>76.96 ± 5.91</b> |
| <b>31</b>             | <b>79.83 ± 5.10</b> | 70                    | 119.4 ± 7.76        |

|    |               |    |                    |
|----|---------------|----|--------------------|
| 32 | 92.53 ± 5.23  | 71 | 86.89 ± 2.37       |
| 33 | 111.3 ± 3.20  | 72 | <i>4900 ± 1013</i> |
| 34 | 102.26 ± 8.11 | 73 | 109.5 ± 9.75       |
| 35 | 153.4 ± 10.1  | 74 | 105.8 ± 14.3       |
| 36 | 87.62 ± 4.09  | 75 | 91.47 ± 7.14       |

Data are presented as mean ± SEM of at least three independent experiments.

<sup>a</sup> The concentration of the test compounds was 100 µM (except #7, #18, #19, #28, #29: 20 µM; #60: 44 µM; #13, #14, #24, #31, #51, #66: 50 µM). The top 10 compounds highlighted in bold were further tested in SKOV3 cells. Two compounds with extremely high 2-NBDG uptake are highlighted in italic.

\* indicated that the compounds caused severe cell loss.

**Table S2.** PCR primers.

| Gene          | Primer sequences                                               | Product size* |
|---------------|----------------------------------------------------------------|---------------|
| <i>hGLUT1</i> | 5'-TTGCAGGCTTCTCCAACCTGGAC-3'<br>5'-CAGAACCAGGAGCAC AGTGAAG-3' | 113 bp        |
| <i>hGLUT2</i> | 5'-AGCTGCGAATAAACAGGCAG-3'<br>5'-AAACTGGAAGGAACCCAGCA-3'       | 159 bp        |
| <i>hGAPDH</i> | 5'-GAAGGTGAAGGTCGGAGT-3'<br>5'-GAAGATGGTGATGGGATT-3'           | 226 bp        |

\*The PCR conditions for *hGLUT1* and *hGAPDH* were initial denaturation at 95 °C for 3 min, 35 (*hGLUT1*) or 40 (*hGAPDH*) cycles of denaturation at 95 °C for 30 s, annealing at 55 °C for 30 s, and extension at 72 °C for 30 s, followed by a final extension at 72 °C for 5 min. The PCR conditions for *hGLUT2* were initial denaturation at 95 °C for 3 min, 40 cycles of denaturation at 95 °C for 30 s, annealing and extension at 60 °C for 60 s, followed by a final extension at 72 °C for 5 min.
